# Supplementary material
Source: publisher figshare collection journal article supplement (https://adisjournals.figshare.com/ndownloader/files/39408292)
Supplement: Supplementary file 1 [file 39408292]

## Abemaciclib: Adis Evaluation

### Clinical Considerations

- First CDK4/6 inhibitor indicated in combination with adjuvant endocrine therapy in patients with HR+, HER2-, node-positive, high-risk disease
- Improvements were seen in invasive disease-free survival and distant recurrence-free survival
- Acceptable tolerability; the most common adverse event was diarrhoea

### Plain Language Summary

#### *Background and rationale*

- In patients with hormone receptor positive (HR+) cancers, endocrine therapy is often used to reduce the risk of breast cancer recurrence after successful initial treatment; however, in a subset of patients, recurrence rates can remain high

#### *Clinical findings*

- In a pivotal phase III trial, the addition of abemaciclib [Verzenio® (USA) or Verzenios® (EU)] to standard endocrine therapy significantly reduced the rate of breast cancer recurrence compared with endocrine therapy alone in patients with HR+, human epidermal growth factor receptor 2 negative (HER2-), node-positive early breast cancer who were at a high risk of recurrence
- Benefit was seen in both patients with characteristics that are associated with higher risk (premenopausal, high Ki-67 scores, previously received neoadjuvant chemotherapy) and comparatively lower risk of recurrence (postmenopausal, low Ki-67 scores)
- Diarrhoea, infections and neutropenia were the most common adverse events in patients receiving abemaciclib plus endocrine therapy
- The overall tolerability of abemaciclib was acceptable

#### *Conclusion*

The addition of abemaciclib to endocrine therapy is a valuable therapeutic option for adjuvant therapy in high-risk patients with HR+, HER2-, node-positive early breast cancer

This plain language summary represents the opinions of the authors. For a full list of declarations, including funding and author disclosure statements, and copyright information, please see the full text online. © Springer Nature Switzerland AG 2023.
